# Supplementary material for: Structure and electronic properties of rare earth DOBDC metal–organic-frameworks
Source: Royal Society of Chemistry journal article supplement (doi:10.1039/c9cp04038b), 2019-01-01
Supplement: c9cp04038b2.pdf [file c9cp04038b2.pdf]

Supplemental Information for:

## Structure and electronic properties of rare earth DOBDC metal-organic-frameworks

Dayton J. Vogel,<sup>†</sup> Dorina F. Sava Gallis,<sup>†</sup> Tina M. Nenoff,<sup>\*,‡</sup> Jessica M. Rimsza<sup>\*,§</sup>

<sup>†</sup>Nanoscale Sciences Department, <sup>‡</sup>Material, Physical, and Chemical Sciences, and <sup>§</sup>Geochemistry Department, Sandia National Laboratories, Albuquerque, New Mexico 87185, United States

\*Corresponding authors: jrimsza@sandia.gov, tmnenof@sandia.gov

Additional figures referred to in the main manuscript are included below. Data used to generate the figures below and in the main manuscript is also included as a supplemental file titled RE-MOF-Data.pdf.

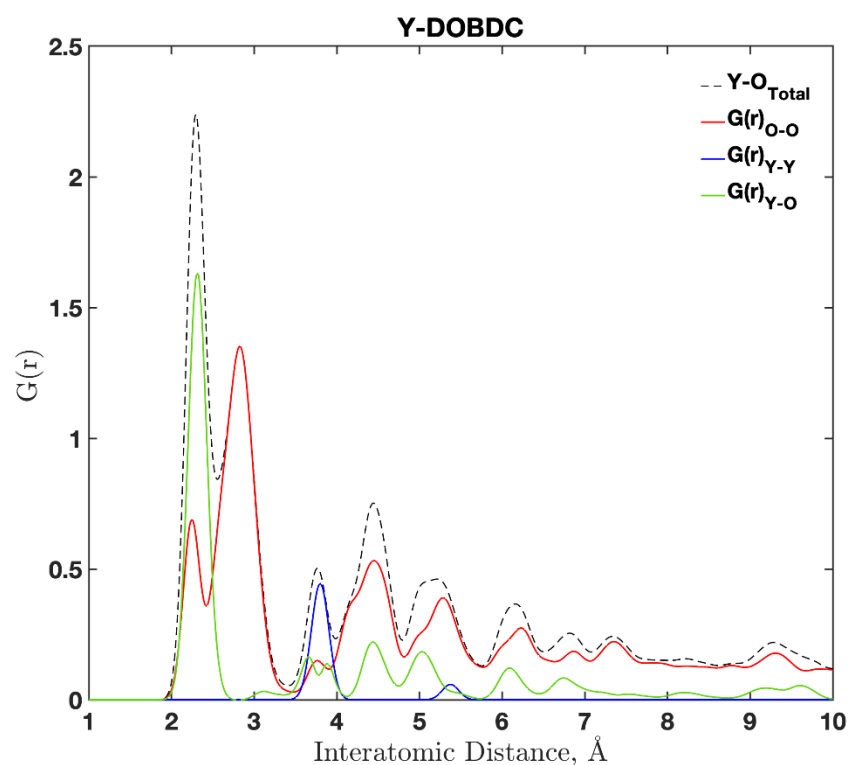

**Figure S1.** Composition of total pair distribution function (dashed line) of Y-DOBDC represented individually by interatomic contributions: O-O(red), Y-Y(blue), and Y-O(green).

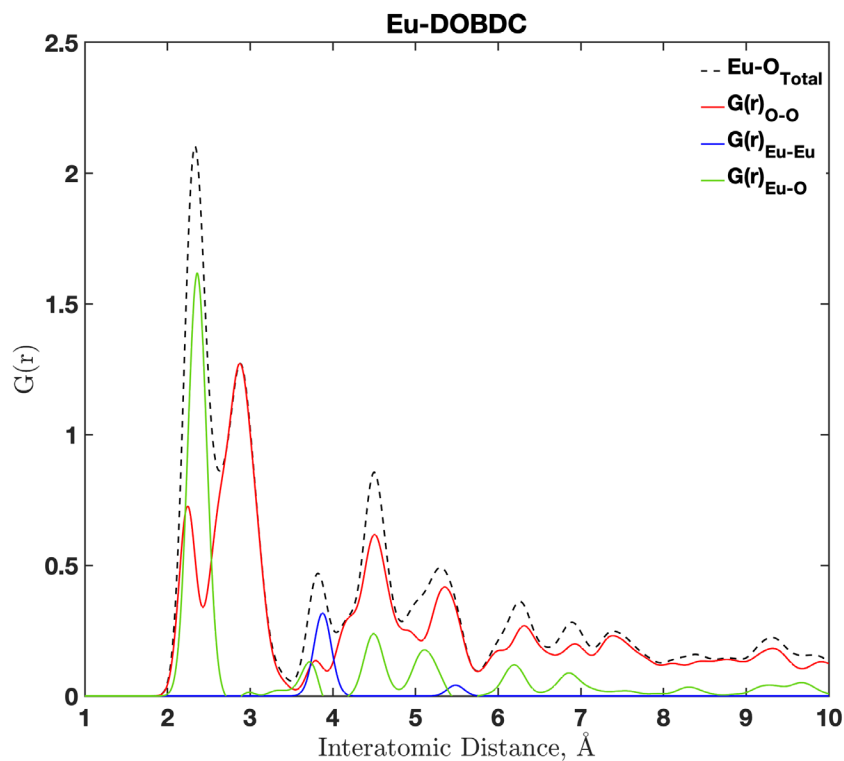

**Figure S2.** Composition of total pair distribution function (dashed line) of Eu-DOBDC represented individually by interatomic contributions: O-O (red), Eu-Eu (blue), and Eu-O (green).

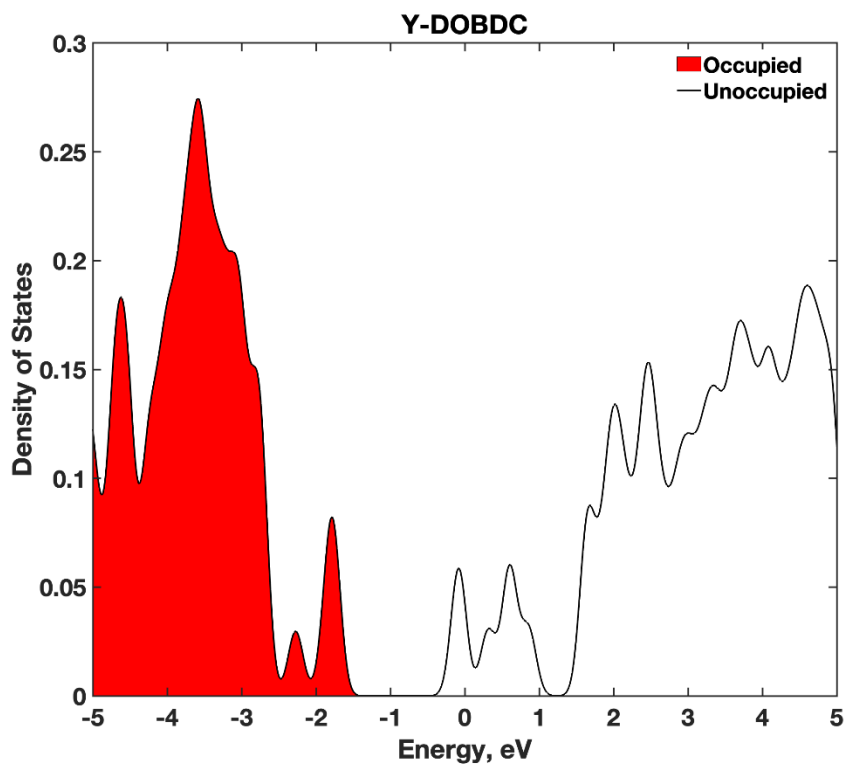

**Figure S3.** Density of states of Y-DOBDC. Shaded (occupied) and unshaded (unoccupied) states represent the valence and conduction bands, respectively.

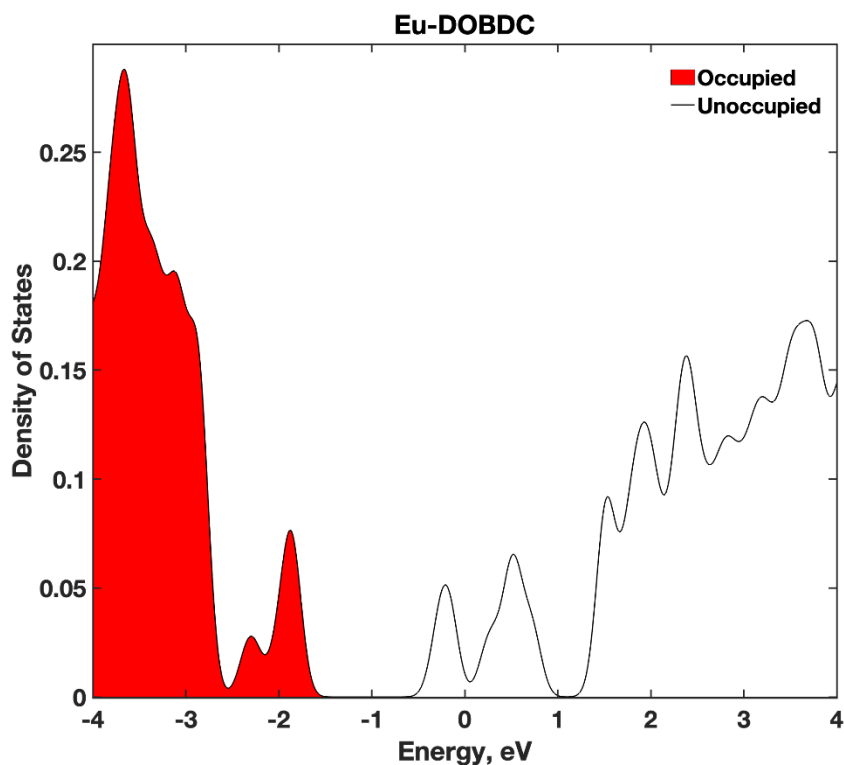

**Figure S4.** Density of states of Eu-DOBDC. Shaded (occupied) and unshaded (unoccupied) states represent the valence and conduction bands, respectively.

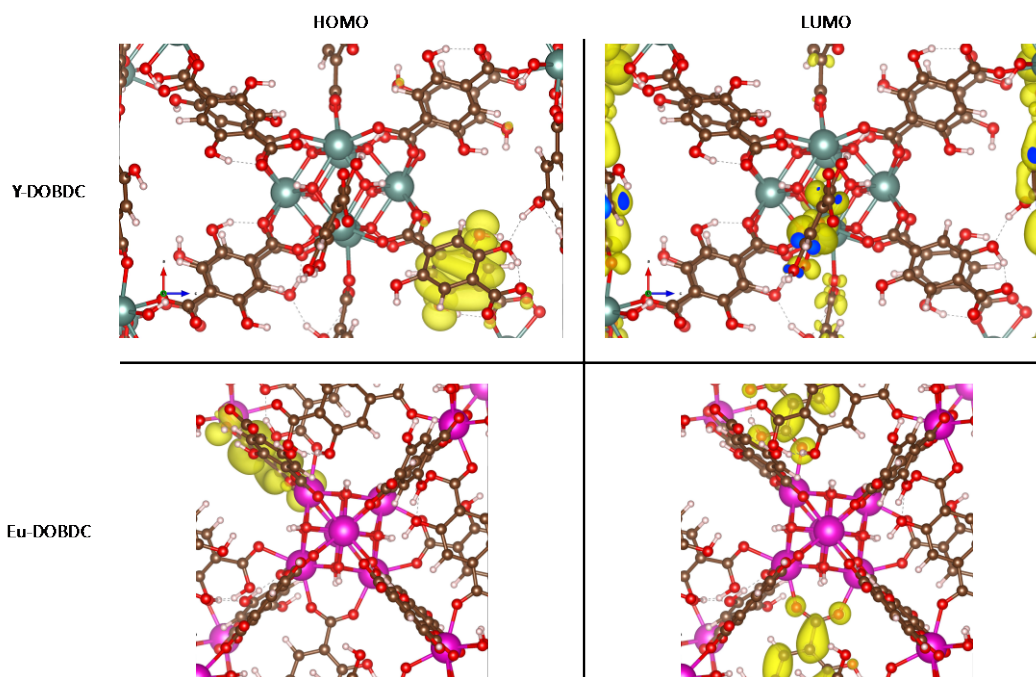

**Figure S5.** Partial charge densities of the highest occupied molecular orbital (HOMO, left) and lowest unoccupied molecular orbital (LUMO, right) for Y- and Eu- DOBDC. For the Y-DOBDC model (top) the elements are presented as Y(green), O(red), C(brown), and H(white). For the Eu-DOBDC model the elements are presented as Eu(pink), O(red), C(brown) and H(white). The partial charge densities are modeled as yellow isosurfaces.

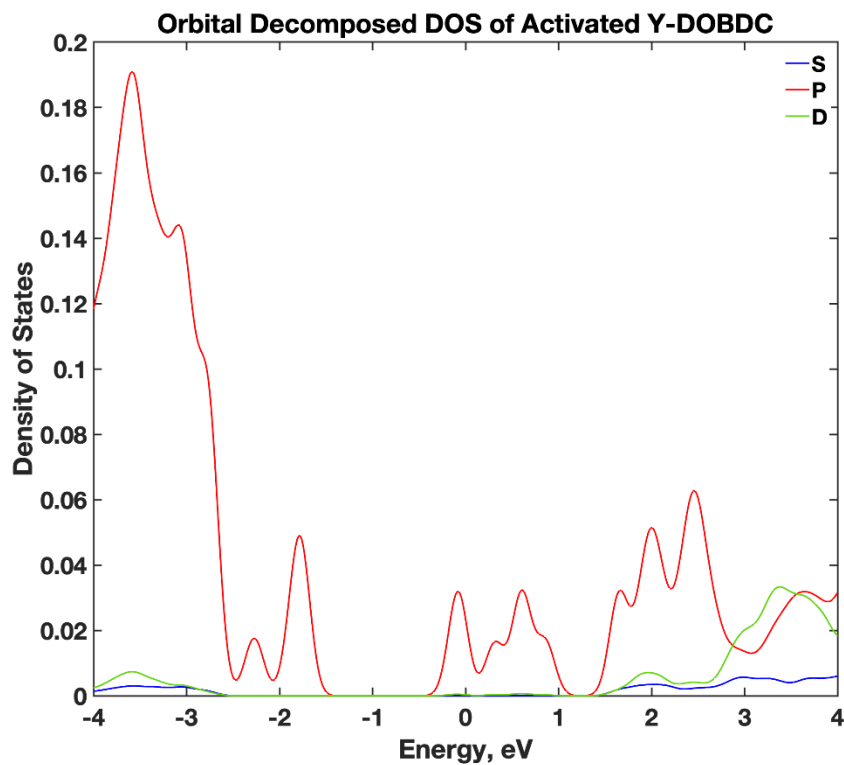

**Figure S6.** Orbital decomposed DOS for Y-DOBDC calculated with spin-restricted DFT.

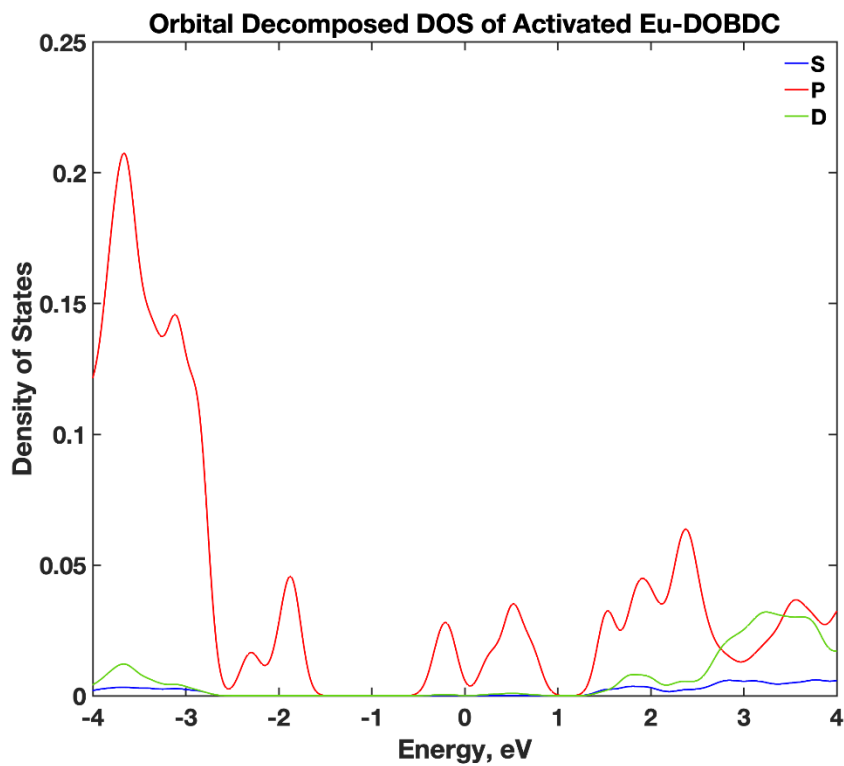

**Figure S7.** Orbital decomposed DOS for Eu-DOBDC calculated with spin-restricted DFT using LCPs.

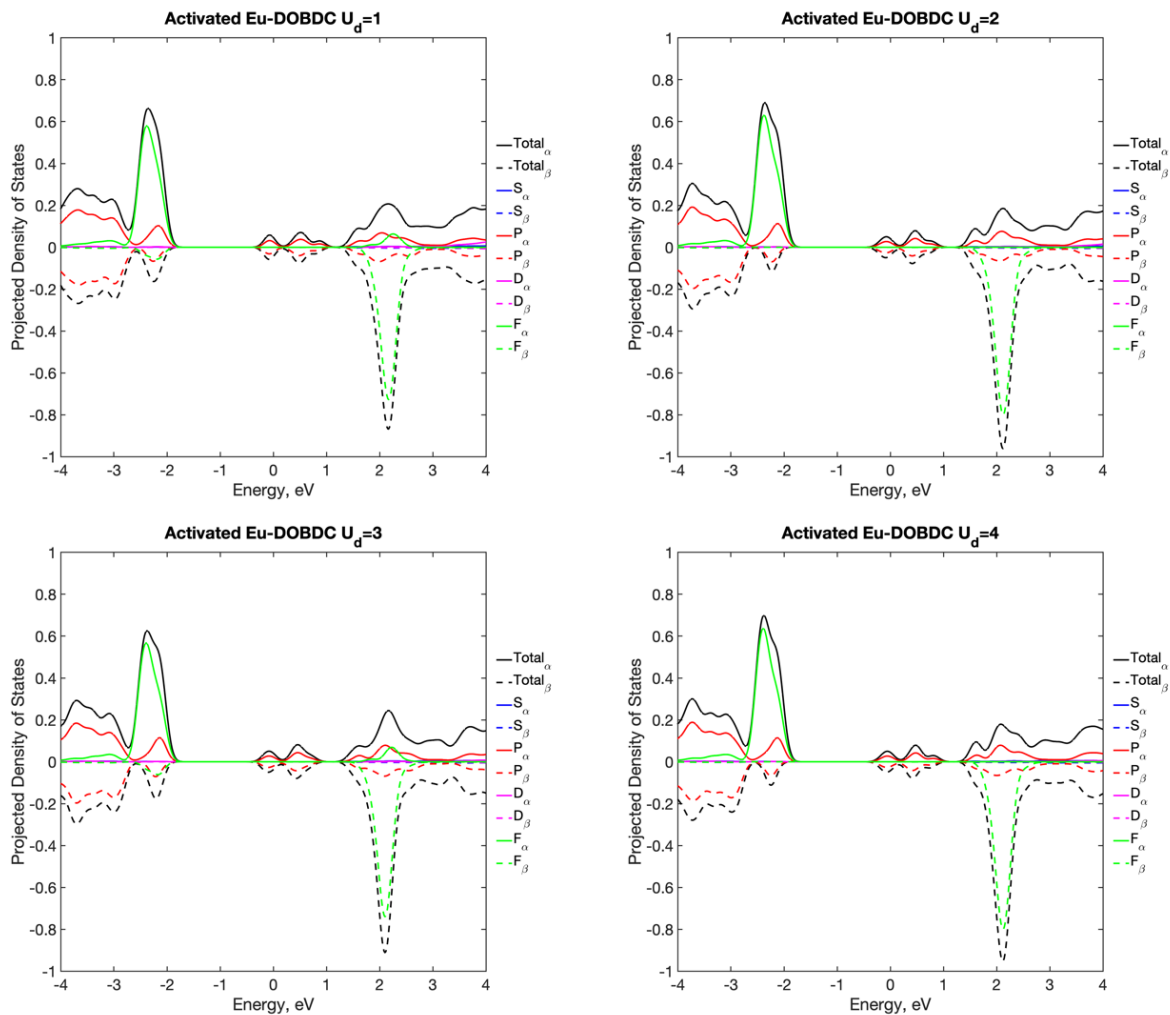

**Figure S8.** Projected density of states (PDOS) for activated Eu-DOBDC calculated with PBEsol-D3+U, where  $U=1-4$ . Each PDOS provides individual orbital contributions (blue, S; red, P; pink, D; green, F) to the total (black) distribution of electronic states for both the alpha (solid) and beta (dashed) spin projections. The Hubbard  $U$  values are applied to the d electrons of Eu.

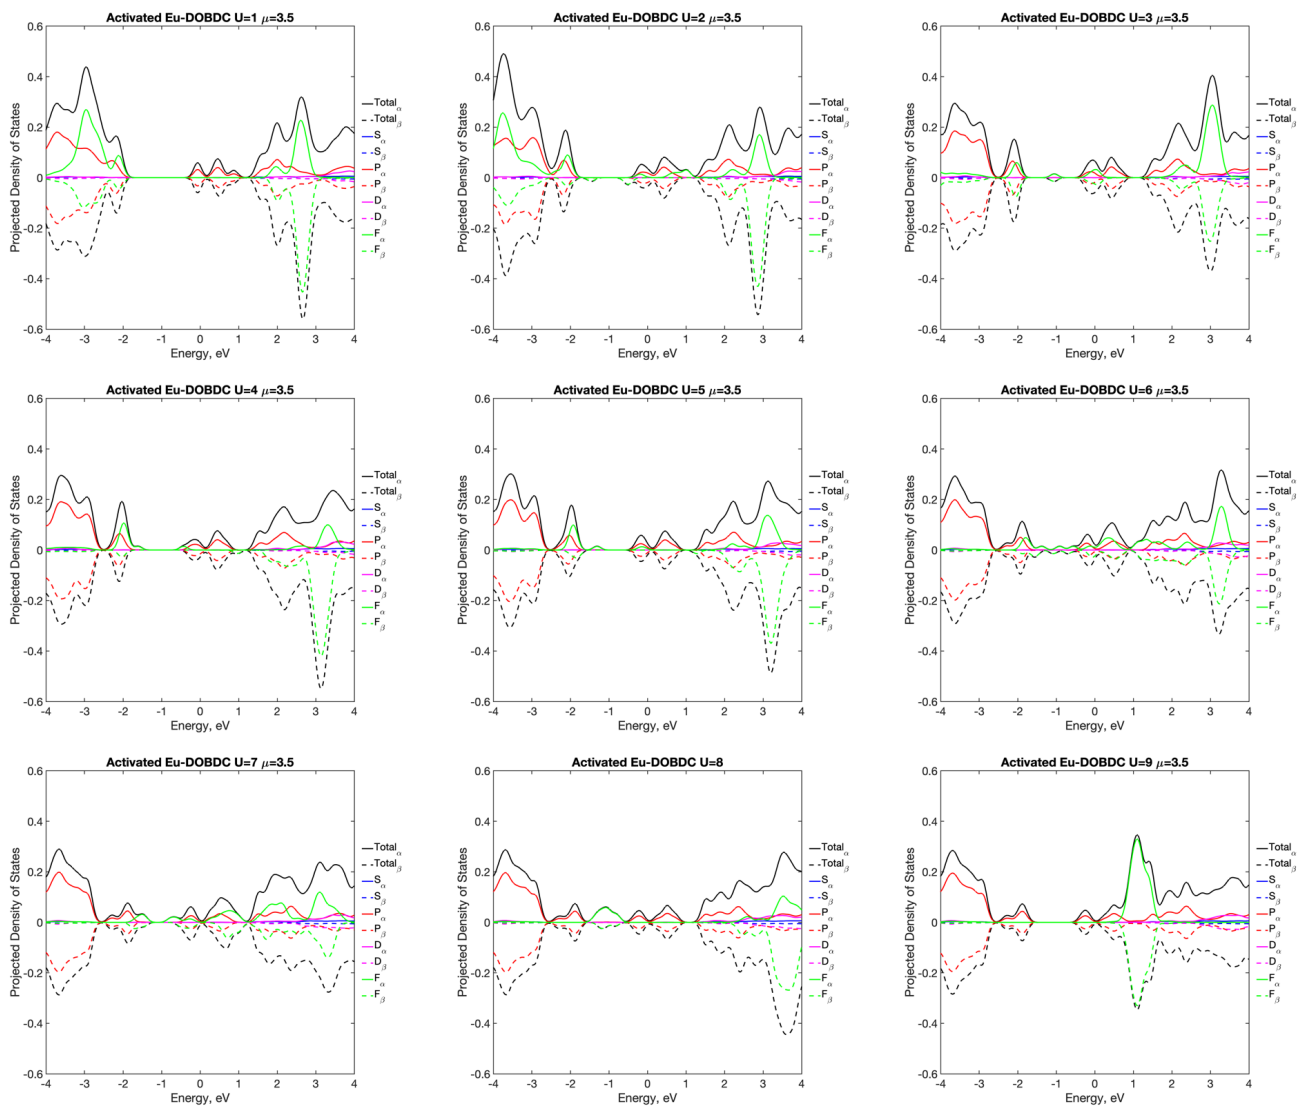

**Figure S9.** Projected density of states (PDOS) for activated Eu-DOBDC calculated with PBEsol-D3+U, where  $U=1-9$ . Each PDOS provides individual orbital contributions (blue, S; red, P; pink, D; green, F) to the total (black) distribution of electronic states for both the alpha (solid) and beta (dashed) spin projections. The Hubbard  $U$  values are applied to the f electrons of Eu.

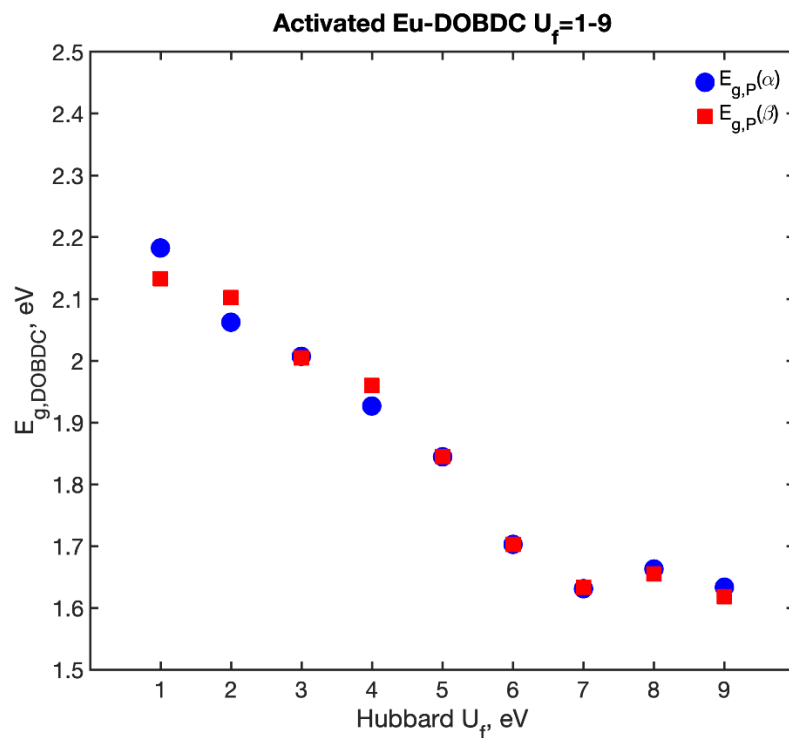

**Figure S10.** Band gap energies calculated for the electronic P orbital states localized on the DOBDC linkers as a function of Hubbard U correction. The DOBDC band gap show that alpha (blue circle) and beta (red square) energies are of similar magnitude for all values of  $U(\text{eV})=1-9$ .

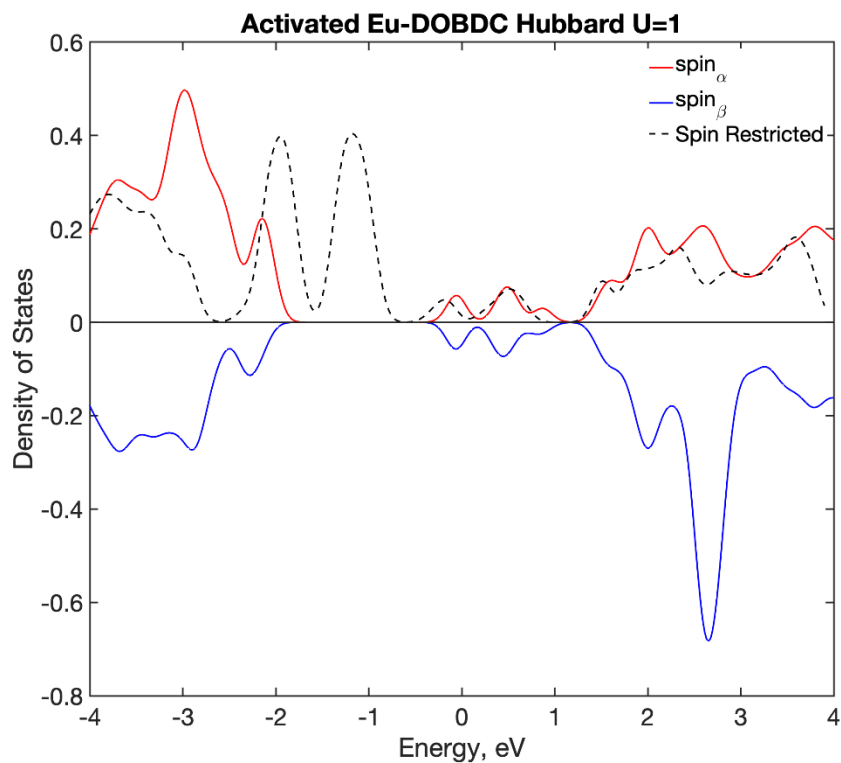

**Figure S11.** DOS comparison of activated Eu-DOBDC calculated with spin restricted and spin unrestricted DFT. The spin-restricted (black dashed) DOS shows a band gap that is nearly closed, whereas the spin-unrestricted (red and blue solid) DOS show the spin  $\alpha$  and  $\beta$ , respectively, have an open gap to allow for expected emission.



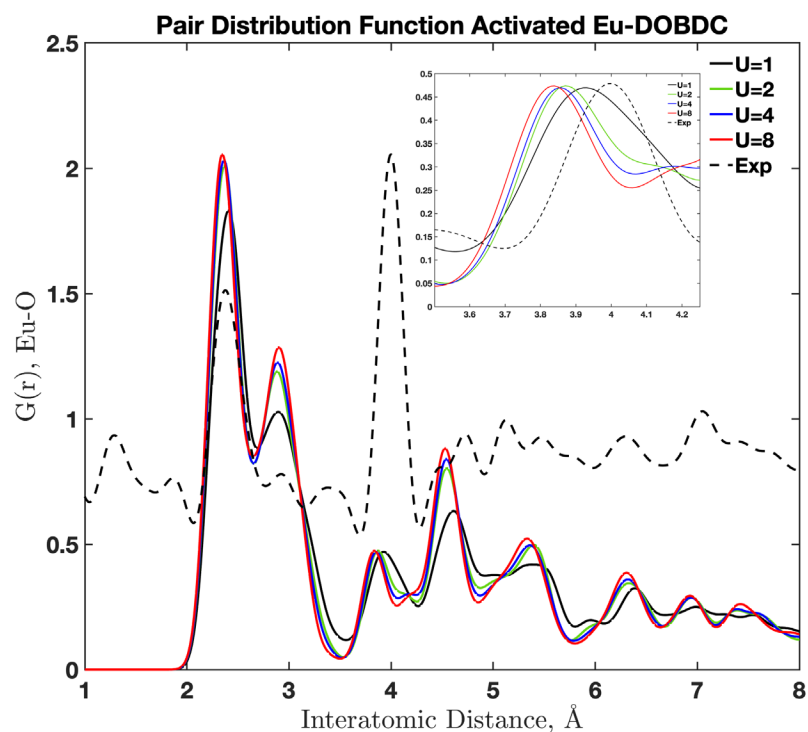

**Figure S12.** Eu-O bond pair distribution functions in activated Eu-DOBDC calculated with spin-unrestricted DFT with varying values of the Hubbard  $U$  correction. The values for  $U=1$  (black), 2 (green), 4 (blue), and 8 (red) are compared with the normalized experimental value (black dashed) presented. The inset displays the calculated and normalized experimental peaks corresponding to the RE-RE peak. The calculated PDFs for  $U>1$  show a more contracted interatomic distance.
